# Supplementary material
Source: HighWire-hosted journal article supplement (http://cmajopen.ca/highwire/filestream/81227/field_highwire_adjunct_files/2/2018-0064-original-submission.pdf)

1  
2  
3 **Reducing Unnecessary Urine Culturing and Antibiotic Overprescribing in Long-term Care: Outcomes of an**  
4 **Implementation Science Informed Quasi-Experimental Study**  
5

6 Kevin Antoine Brown, PhD<sup>1,4</sup>; Andrea Chambers, PhD<sup>1</sup>; Sam MacFarlane, RN<sup>1</sup>; Bradley Langford, PharmD<sup>1,2</sup>;  
7 Valerie Leung<sup>1</sup>; Jacquelyn Quirk, MPH<sup>1</sup>; Kevin L. Schwartz, MD, MSc<sup>1,4</sup>; Gary Garber, MD<sup>1,3</sup>  
8  
9

10  
11  
12 <sup>1</sup>Public Health Ontario, Toronto, ON, Canada  
13

14 <sup>2</sup>St. Joseph's Health Centre, Toronto, ON, Canada  
15

16 <sup>3</sup>Department of Medicine, University of Toronto, Toronto, ON, Canada  
17

18 <sup>4</sup>Dalla Lana School of Public Health, University of Toronto, Toronto, ON, Canada  
19  
20

21  
22 **Author declaration**  
23

24 All authors report no conflicts  
25  
26  
27  
28

29 **Word Count**  
30

31 Abstract: 247 (MAX 250)  
32

33 Main text: 2467 (MAX 2500)  
34  
35  
36  
37

38 **Funding statement**  
39

40 This study was conducted with Public Health Ontario operational funds and received no external funding  
41  
42  
43

44 **Corresponding Author**  
45

46 Kevin Antoine Brown  
47 480 University Ave, Suite 300  
48 Toronto, ON M5G1V2  
49 CANADA  
50 +1-416-737-1785  
51 [kevin.brown@utoronto.ca](mailto:kevin.brown@utoronto.ca) / [kevin.brown@oahpp.ca](mailto:kevin.brown@oahpp.ca)  
52  
53  
54  
55  
56  
57

**Abstract**

BACKGROUND: Antibiotic use in long-term care homes is highly variable and high rates of antibiotic use are associated with antibiotic resistance and *C. difficile* infection. Treatment of asymptomatic bacteriuria accounts for the majority of urinary antibiotic use in long-term care facilities. We sought to measure the impact of a multi-component program designed to improve diagnosis and management of urinary tract infections (UTIs) in non-catheterized residents of long-term care homes.

METHODS: We conducted a quasi-experimental study comparing urine culturing and antibiotic prescribing rates before and after implementation of the UTI Program. The population included residents of 10 long-term care homes in Ontario, Canada, between December 2015 and May 2017. The UTI Program recommended nine strategies to decrease urine culturing and antibiotic prescribing among patients that did not meet criteria for a UTI. We measured home-level monthly rates of urine specimens sent for culture and susceptibility testing, prescriptions for antibiotics commonly used to treat UTIs, and total antibiotic prescriptions.

RESULTS: Homes implemented an average of 6.1 out of the 9 strategies. Urine culturing fell from 3.20 to 2.09 per 1,000 resident-days from the baseline to the intervention phase ( $IRR_{adjusted}=0.72$ , 95% confidence interval [CI]: 0.63–0.82), urinary antibiotic prescriptions fell from 1.52 to 0.83 per 1,000 resident-days ( $IRR_{adjusted}=0.59$ , 95%CI: 0.46–0.73) and total antibiotic prescriptions fell from 3.85 to 2.60 per 1,000 resident-days ( $IRR_{adjusted}=0.73$ , 95%CI: 0.65–0.82).

INTERPRETATION: We demonstrated a reduction in urine culturing and antibiotic use following implementation of a multi-component program for improving the diagnosis and treatment of UTIs.

## Introduction

Rates of antibiotic use in long-term care facilities are highly variable<sup>1</sup> and high rates of antibiotic use are associated antibiotic resistance and *C. difficile* infection.<sup>2,3</sup> Over 30% of antibiotics prescribed in long-term care are for urinary indications.<sup>4</sup> One practice that can contribute to the overuse of antibiotics for urinary indications is the treatment of asymptomatic bacteriuria.<sup>5,6</sup>

Asymptomatic bacteriuria refers to the presence of bacteria in the urine in the absence of clinical signs and symptoms of a urinary tract infection (UTI).<sup>5</sup> The prevalence of asymptomatic bacteriuria in long-term care residents is high; estimated at 15-30% of men and 25-50% of women.<sup>7,8</sup> Several randomized control trials have found that the systematic screening and treatment of asymptomatic bacteriuria in long-term care is not beneficial to residents.<sup>9,10</sup> The Infectious Diseases Society of America and the Association of Medical Microbiology and Infectious Disease Canada both discourage this practice.<sup>6,11</sup> In many long-term care facilities, treatment of asymptomatic bacteriuria accounts for the majority of urinary antibiotic use.<sup>12</sup>

Public Health Ontario (PHO), an arm's length government agency that provides scientific expertise and technical support to front-line healthcare workers, developed a multi-component UTI program to improve diagnosis and management of UTIs in non-catheterized residents of long-term care homes (LTCHs). The program built on several studies showing that interventions designed to improve diagnosis and management of UTIs are effective at reducing antimicrobial use in long-term care homes.<sup>13-15</sup> The purpose of this pilot study was to measure the impact of a multi-component UTI program on urine culturing and antibiotic prescribing rates.

## Methods

### *Setting and participants*

A purposive sampling strategy was used to recruit 12 LTCHs in the province of Ontario, Canada. PHO staff identified an initial list of LTCHs that had previously expressed interest in making improvements to their

1  
2  
3 practices in this area and that would provide variation by region, size and ownership type. To be eligible to  
4  
5 participate in the pilot, the LTCH had to identify at least 3 staff healthcare providers to participate on an  
6  
7 implementation team and be able to provide monthly lab and pharmacy reports. LTCHs met with PHO staff to  
8  
9 establish a plan for the implementation of the program in mid-2016. The monthly number of urine cultures sent,  
10  
11 antibiotic prescriptions, and count of residents were collected from December 2015 to May 2017.  
12  
13

### 14 15 *Intervention design*

16  
17  
18 The UTI Program focused on five recommended practice changes: (1) obtain urine cultures only when residents  
19  
20 have the indicated clinical signs and symptoms of a UTI; (2) obtain urine specimens according to a midstream  
21  
22 procedure or an “in-and-out” catheterization; (3) prescribe antibiotics only when specified clinical criteria have  
23  
24 been met; (4) cease the use of dipsticks for the diagnosis of UTI; and (5) cease urine culture screening (i.e. on  
25  
26 admission or annually) if residents don’t have clinical signs and symptoms of a UTI. An algorithm was established  
27  
28 for the program to guide best practices in the assessment and management of potential UTIs for non-  
29  
30 catheterized residents.<sup>16</sup> The algorithm was based on the 2005 Loeb criteria with additional considerations for  
31  
32 residents with advanced dementia.<sup>7,17</sup> Accepted clinical signs and symptoms of a UTI are defined as: new difficult  
33  
34 or painful urination (acute dysuria) alone and/or two or more of the following: fever, new flank pain or  
35  
36 suprapubic pain, new or increased urinary frequency/urgency, gross hematuria, and acute onset of delirium in  
37  
38 residents with advanced dementia. The program was targeted at physicians, nurses, administrators,  
39  
40 pharmacists, and other front-line workers, residents, and families of residents.  
41  
42  
43  
44  
45

46 The program recommended nine strategies that LTCHs could use to support practice changes (Table 1). A broad  
47  
48 range of barriers to improving urinary antibiotic prescribing were identified by healthcare workers in a survey  
49  
50 conducted in 2013. Then, we conducted an intervention mapping process to connect practice change barriers to  
51  
52 recommended strategies using behaviour change theory.<sup>15,18,19</sup> For each LTCH, the implementation planning  
53  
54 process<sup>16</sup> involved three one-hour meetings that were facilitated by PHO staff. During this process, the LTCH  
55  
56  
57  
58  
59  
60

1  
2  
3 implementation team completed an assessment of readiness and baseline alignment with the five practice  
4  
5 changes, identified barriers and facilitators to practice change specific to the home, and determined a plan to  
6  
7 implement the strategies.  
8  
9

### 10 *Strategy implementation*

11  
12  
13 A classification guide was designed to assess whether each of the 9 recommended strategies was implemented  
14  
15 by each home; the assessments were based on notes from the implementation planning process and interviews  
16  
17 with PHO and LTCH staff. The assessments were completed independently by two PHO staff reviewers (JQ and  
18  
19 AC) and disagreements were resolved by negotiation.  
20  
21

### 22 *Outcomes*

23  
24  
25 The outcomes for the evaluation were the home-level monthly rates (per 1,000 resident-days) of: (1) urine  
26  
27 specimens sent for culture and susceptibility testing, (2) prescriptions for antibiotics commonly used to treat  
28  
29 urinary tract infections (defined as ciprofloxacin, norfloxacin, nitrofurantoin, trimethoprim with or without  
30  
31 sulfamethoxazole, and fosfomycin and referred to as “urinary antibiotics” in this study), and (3) prescriptions for  
32  
33 any antibiotic. The number of urine cultures sent were identified from the monthly laboratory reports, while  
34  
35 antibiotic prescriptions were identified from monthly pharmacy reports, which were made available for all  
36  
37 participating LTCHs, and sent to PHO for abstraction. Pharmacy reports were reviewed and abstracted by a PHO  
38  
39 pharmacist. To focus on antibiotics prescribed for the treatment of acute uncomplicated infections, including  
40  
41 UTIs, only oral antibiotics prescribed for a duration of 3 to 14 days were included, with the exception of  
42  
43 fosfomycin which is commonly prescribed as a one day course for treatment of UTIs. Resident-days refer to the  
44  
45 number of days that each resident stayed at an LTCH within a given month, summed across all residents.  
46  
47  
48  
49  
50

### 51 *Other covariates*

1  
2  
3 LTCH size, was measured as a linear covariate equal to the mean number occupied beds over the study period. A  
4  
5 harmonic oscillator was used to capture winter seasonality, which has been documented for antibiotic  
6  
7 prescribing;<sup>20</sup> the phase shift was adjusted to allow peaks to be centered at January 1<sup>st</sup> of each year.<sup>21</sup>  
8  
9

### 10 *Statistical Analysis*

11  
12  
13 For each home, we identified the implementation period as those months spanning from the 1<sup>st</sup> implementation  
14  
15 planning meeting until two months after the 3<sup>rd</sup> implementation planning meeting. Months before the  
16  
17 implementation period were termed the *baseline* period, and months after the implementation period were  
18  
19 termed the *intervention* period. All intervention effect analyses compared the baseline periods to intervention  
20  
21 periods. Our a priori power analysis suggested that 10 months of follow-up (equally split between baseline and  
22  
23 intervention periods) among 10 LTCHs would be sufficient to identify a 25% drop in urine culturing with 90%  
24  
25 power, we opted to recruit 15 homes to account for potential loss to follow up.  
26  
27  
28  
29

30 In unadjusted models, we fit Poisson random effects level change models of the monthly rates of urine culturing  
31  
32 and antibiotic prescribing.<sup>22</sup> These models included fixed effects terms for intercept at baseline, and intervention  
33  
34 level change. Random effects captured inter-home variation in baseline rates, and intervention level changes. In  
35  
36 adjusted models, we fit analogous models that also included fixed effects for LTCH size and seasonality.<sup>22</sup>  
37  
38  
39

40 The impact of the intervention was the estimated fixed effect of the intervention period, compared to the  
41  
42 baseline period, measured using the incidence rate ratio (IRR). Unadjusted and adjusted models were fit using  
43  
44 Markov Chain Monte Carlo sampling using the rstanarm package in R,<sup>23</sup> using default weakly informative priors  
45  
46 on all parameters (normal[0, 10] for intercept, normal[0,2.5] for other fixed effects, half-cauchy[0, 5] for random  
47  
48 effects, and an LKJ(1) prior for the random effects correlation matrix<sup>24</sup>). As a sensitivity analysis to better  
49  
50 understand the impact of urine culturing practices on antibiotic prescribing, we fit additional Poisson random  
51  
52 effects models for urinary and total antibiotic prescribing that included a fixed effect term for the phase-specific  
53  
54 urine culturing rates.  
55  
56  
57

## Results

In total 15 homes were approached to participate in the UTI Program, of which 12 agreed to participate (Figure 1). As of September 2017, 10 out of 12 LTCHs that were recruited completed implementation, totalling 163 LTCH-months and 793,200 resident-days (Figure 1, Table 2) of follow-up. All of the LTCHs were freestanding, unaffiliated with a hospital; 5 were private, 3 were non-profit and 2 were municipally run. Over the study period, 2,093 urine cultures were collected across the homes (2.64 per 1,000 person-days), and 2,535 antibiotic prescriptions were dispensed (3.20 per 1,000 resident-days), of which 947 (37%) were for antibiotics commonly used to treat UTIs (1.19 per 1,000 resident-days).

The LTCH-specific implementation periods began between June and September 2016, and lasted between 4 and 6 months. All homes transitioned to the intervention period by January 2017. Over the study period there was a decrease in the rates of urine culturing, urinary antibiotic prescribing, and total antibiotic prescribing (Figure 2).

### *Strategy implementation*

Homes implemented an average of 6.1 out of the 9 strategies. The most frequently implemented strategies (Table 1) were selecting and empowering champions, carrying out local consensus processes, delivering classroom education to staff, and identifying and supporting coaches to reinforce key practices and support staff, each of which were implemented by 8 of the 10 homes. The least frequently implemented strategy was integrating process surveillance and providing regular feedback to staff, which was only implemented by 4 of the 10 homes.

### *Intervention effect analysis*

Urine culturing fell from 3.20 per 1,000 resident-days to 2.09 per 1,000 resident-days from the baseline to the intervention phase. Similarly, urinary antibiotic prescriptions fell from 1.52 per 1,000 resident-days to 0.83 per 1,000 resident-days and total antibiotic prescriptions fell from 3.85 per 1,000 resident-days to 2.60 per 1,000

1  
2  
3 resident-days (Table 2). Unadjusted and adjusted models yielded similar estimates of intervention effect. The  
4  
5 adjustment models, that controlled for seasonality in urine culturing and antibiotic prescribing and home size,  
6  
7 estimated a 29% decline in urine culturing (IRR=0.72, 95%CI: 0.63–0.82), a 41% decline in urinary antibiotic  
8  
9 prescriptions (IRR=0.59, 95%CI: 0.46–0.73), and a 27% decline in total antibiotic prescriptions (IRR=0.73, 95%CI:  
10  
11 0.65–0.82) across the participating homes.  
12  
13

#### 14 15 *LTCH-level variation in urine culturing and antibiotic prescribing*

16  
17  
18 There was substantial variation in urine culturing and antibiotic prescribing across homes, and homes with  
19  
20 higher rates of urine culturing also had higher antibiotic prescribing (Figure 3). This association held true for both  
21  
22 urinary antibiotic prescribing (IRR per 1/1,000 increase in urine culturing = 1.26, 95%CI: 1.07–1.47) and for total  
23  
24 antibiotic prescribing (IRR per 1/1,000 increase in urine culturing = 1.17, 95%CI: 1.04–1.33).  
25  
26  
27

#### 28 **Interpretation**

29  
30  
31 Rates of urine culturing and antibiotic prescribing declined after the implementation of a program designed to  
32  
33 improve diagnosis and management of urinary tract infections in non-catheterized residents of long-term care  
34  
35 homes. The recommended implementation strategies, with the exception of process surveillance and feedback  
36  
37 reporting to staff, were implemented by the majority of homes. LTCH rates of urine culturing were strongly  
38  
39 associated with antibiotic prescribing, and inter-home variation in rates of antibiotic prescribing and urine  
40  
41 culturing persisted after implementation of the program, suggesting that it may be possible to further reduce  
42  
43 urine culturing and antibiotic prescribing in certain homes.  
44  
45  
46  
47  
48  
49  
50

#### 51 *Comparison with other studies*

52  
53  
54 The UTI Program was informed by a previous review<sup>13</sup> showing that implementation of syndrome-specific  
55  
56 interventions targeting prescribing for urinary tract infection were effective, yielding reductions in urine  
57



1  
2  
3 culturing and prescribing for urinary indications, and total antibiotic use. One cluster randomized controlled trial  
4 of 20 LTCHs<sup>25</sup> showed that a UTI-targeted intervention in Canada and the United States was associated with an  
5 18% decline in urine culturing rates (from 2.5 to 2.0 per 1,000 resident-days) and a 10% decline in total antibiotic  
6 use (from 3.9 to 3.5 courses per 1,000 resident-days), though this latter finding was not statistically significant.  
7  
8 Another single centre non-randomized study<sup>12</sup> demonstrated a 59% decline in urine culturing rates and 30%  
9 decline in total antibiotic use. Our study demonstrated reductions in urine culturing, urinary antibiotic use, and  
10 total antibiotic use of 28%, 41%, and 27%, respectively. Our findings highlight the importance of investing time  
11 and providing support to build readiness for change and offering implementation interventions that target a  
12 broader range of barriers to practice change to reduce antibiotic use for asymptomatic bacteriuria. Furthermore,  
13 the persistent inter-home variation observed between antibiotic use and urine culturing suggest that there are  
14 further opportunities to reduce urine culturing and subsequent unnecessary antibiotic prescribing.  
15  
16

17  
18  
19 The UTI Program had 9 recommended strategies and our pilot found that, with one exception, these strategies  
20 were implemented in the majority of homes. However, the strategy of *integrating process surveillance and*  
21 *providing regular feedback to staff* was implemented in only 4 of the 10 homes. Feedback from homes  
22 suggested that adherence to this strategy could be improved by ensuring that new documentation requirements  
23 are as simple as possible and integrated into existing processes to minimize the additional work involved in  
24 tracking symptoms. This could include integrating documentation of relevant symptoms into electronic medical  
25 records using prompts when requesting a urine culture.<sup>26</sup> Assessment of the strategy implementation also found  
26 that oftentimes homes were not conducting feedback reporting to LTCH staff, in part because of the lack of time  
27 and expertise required to compile, tabulate, and interpret the data. As such, central preparation of home-  
28 specific feedback reports could improve program implementation.<sup>27</sup>  
29  
30  
31  
32  
33  
34  
35  
36  
37  
38  
39  
40  
41  
42  
43  
44  
45  
46  
47  
48  
49  
50

51  
52 Our study also found substantial variation in rates of urine culturing and that these rates of urine culturing were  
53 associated with both total and especially urinary antibiotic prescribing. While it is known that receipt of a urine  
54  
55  
56  
57

1  
2  
3 culture may act as a gateway to antibiotic exposure among individual residents,<sup>5,6</sup> this is the first study to show  
4 that homes with systematically higher rates of urine culturing also tend to have higher rates of antibiotic  
5 utilization. This provides evidence of the importance of urine culturing practices as a driver of home-level  
6 antibiotic use and complements previous studies demonstrating that patient-characteristics are not primary  
7 drivers of antibiotic prescribing<sup>1</sup> or duration of antibiotics prescribed.<sup>28</sup> Further, plans to expand the UTI  
8 Program to the province's 625 LTCHs could prioritize homes with high baseline urine culturing or urinary  
9 antibiotic prescribing rates because these homes could achieve the largest absolute reductions in antibiotic use.  
10  
11  
12  
13  
14  
15  
16  
17  
18

### 19 *Limitations*

20  
21  
22 First, we used a before-after design, meaning that, without a parallel arm that did not experience the  
23 intervention, we could not control for time-trends in antibiotic use that were independent of the intervention.  
24  
25 However, similar levels of urine culturing and antibiotic use were reported in 2005, suggesting that time-trends  
26 were non-existent or weak.<sup>25</sup> Second, the format and comprehensiveness of pharmacy reports differed  
27 depending on the LTCH's pharmacy provider and therefore interpretation was required during the data  
28 abstraction process. Third, this study did not capture downstream impacts of the intervention, including  
29 potential harms due to antibiotic overuse (*C. difficile* infection) or due to less antibiotic use (emergency  
30 department visits). Finally, this study was unable to consider the long-term sustainability of the pilot program.  
31  
32  
33  
34  
35  
36  
37  
38  
39  
40

### 41 *Conclusion*

42  
43  
44 We demonstrated a decline in urine culturing rates and antibiotic use following implementation of a multi-  
45 component program focused on improving the diagnosis and treatment of UTI. This pilot data supports a  
46 broader implementation of this program to decrease inappropriate urine culturing and antibiotic use in LTCHs.  
47  
48  
49  
50  
51  
52  
53  
54  
55  
56  
57

## References

1. Daneman N, Gruneir A, Newman A, Fischer HD, Bronskill SE, Rochon PA, et al. Antibiotic use in long-term care facilities. *J Antimicrob Chemother*. 2011 Dec 1;66(12):2856–63.
2. Brown KA, Daneman N, Jones M, Nechodom K, Stevens V, Adler FR, et al. The Drivers of Acute and Long-term Care *Clostridium difficile* Infection Rates: A Retrospective Multilevel Cohort Study of 251 Facilities. *Clin Infect Dis Off Publ Infect Dis Soc Am*. 2017 15;65(8):1282–8.
3. Brown KA, Jones M, Daneman N, Adler FR, Stevens V, Nechodom KE, et al. Importation, Antibiotics, and *Clostridium difficile* Infection in Veteran Long-Term Care: A Multilevel Case–Control Study. *Ann Intern Med*. 2016 Jun 21;164(12):787–94.
4. Benoit SR, Nsa W, Richards CL, Bratzler DW, Shefer AM, Steele LM, et al. Factors Associated with Antimicrobial Use in Nursing Homes: A Multilevel Model: ANTIMICROBIAL USE IN NURSING HOMES. *J Am Geriatr Soc*. 2008 Nov;56(11):2039–44.
5. Nicolle LE. Asymptomatic bacteriuria: review and discussion of the IDSA guidelines. *Int J Antimicrob Agents*. 2006 Aug;28:42–8.
6. Nicolle LE, Bradley S, Colgan R, Rice JC, Schaeffer A, Hooton TM. Infectious Diseases Society of America Guidelines for the Diagnosis and Treatment of Asymptomatic Bacteriuria in Adults. *Clin Infect Dis*. 2005 Mar 1;40(5):643–54.
7. D’Agata E, Loeb MB, Mitchell SL. Challenges in assessing nursing home residents with advanced dementia for suspected urinary tract infections. *J Am Geriatr Soc*. 2013 Jan;61(1):62–6.
8. Nicolle LE, SHEA Long-Term-Care-Committee. Urinary tract infections in long-term-care facilities. *Infect Control Hosp Epidemiol*. 2001 Mar;22(3):167–75.
9. Nicolle LE, Mayhew WJ, Bryan L. Prospective randomized comparison of therapy and no therapy for asymptomatic bacteriuria in institutionalized elderly women. *Am J Med*. 1987 Jul;83(1):27–33.
10. Zalmanovici Trestioreanu A, Lador A, Sauerbrun-Cutler M-T, Leibovici L. Antibiotics for asymptomatic bacteriuria. In: The Cochrane Collaboration, editor. *Cochrane Database of Systematic Reviews* [Internet]. Chichester, UK: John Wiley & Sons, Ltd; 2015 [cited 2017 Jul 11]. Available from: <http://doi.wiley.com/10.1002/14651858.CD009534.pub2>
11. Association of Medical Microbiology and Infectious Disease Canada Antimicrobial Stewardship and Resistance Committee. Symptom-Free Pee: LET IT BE [Internet]. 2017 [cited 2017 Aug 14]. Available from: [www.ammi.ca/?ID=127](http://www.ammi.ca/?ID=127)
12. Zabarsky TF, Sethi AK, Donskey CJ. Sustained reduction in inappropriate treatment of asymptomatic bacteriuria in a long-term care facility through an educational intervention. *Am J Infect Control*. 2008 Sep;36(7):476–80.
13. Nicolle LE. Antimicrobial stewardship in long term care facilities: what is effective? *Antimicrob Resist Infect Control*. 2014;3(1):6.

14. Pinnock H, Barwick M, Carpenter CR, Eldridge S, Grandes G, Griffiths CJ, et al. Standards for Reporting Implementation Studies (StaRI) Statement. *BMJ*. 2017 Mar 6;i6795.
15. French SD, Green SE, O'Connor DA, McKenzie JE, Francis JJ, Michie S, et al. Developing theory-informed behaviour change interventions to implement evidence into practice: a systematic approach using the Theoretical Domains Framework. *Implement Sci [Internet]*. 2012 Dec [cited 2017 Sep 27];7(1). Available from: <http://implementationscience.biomedcentral.com/articles/10.1186/1748-5908-7-38>
16. Ontario Agency for Health Protection and Promotion (Public Health Ontario). Urinary tract infection (UTI) program implementation guide [Internet]. 2016 [cited 2017 Aug 14]. Available from: [https://www.publichealthontario.ca/en/BrowseByTopic/IPAC/Documents/UTI\\_Program\\_Implementation\\_Guide.pdf](https://www.publichealthontario.ca/en/BrowseByTopic/IPAC/Documents/UTI_Program_Implementation_Guide.pdf)
17. Nace DA, Drinka PJ, Crnich CJ. Clinical uncertainties in the approach to long term care residents with possible urinary tract infection. *J Am Med Dir Assoc*. 2014 Feb;15(2):133–9.
18. Michie S, van Stralen MM, West R. The behaviour change wheel: a new method for characterising and designing behaviour change interventions. *Implement Sci IS*. 2011 Apr 23;6:42.
19. Weir MC, Ryan R, Mayhew A, Worswick J, Santesso N, Lowe D, et al. The Rx for Change database: a first-in-class tool for optimal prescribing and medicines use. *Implement Sci [Internet]*. 2010 Dec [cited 2017 Oct 27];5(1). Available from: <http://implementationscience.biomedcentral.com/articles/10.1186/1748-5908-5-89>
20. Kwong JC, Maaten S, Upshur REG, Patrick DM, Marra F. The Effect of Universal Influenza Immunization on Antibiotic Prescriptions: An Ecological Study. *Clin Infect Dis*. 2009 Sep;49(5):750–6.
21. Lofgren E, Fefferman N, Doshi M, Naumova EN. Assessing Seasonal Variation in Multisource Surveillance Data: Annual Harmonic Regression. In: Zeng D, Gotham I, Komatsu K, Lynch C, Thurmond M, Madigan D, et al., editors. *Intelligence and Security Informatics: Biosurveillance*. Berlin: Springer; 2007. p. 114–23.
22. Lopez Bernal J, Cummins S, Gasparrini A. Interrupted time series regression for the evaluation of public health interventions: a tutorial. *Int J Epidemiol*. 2016 Jun 9;dyw098.
23. Gelman A, Lee D, Guo J. Stan: A Probabilistic Programming Language for Bayesian Inference and Optimization. *J Educ Behav Stat*. 2015 Oct 1;40(5):530–43.
24. Alvarez I, Niemi J, Simpson M. Bayesian inference for a covariance matrix. *Anu Conf Appl Stat Agric*. 2014;26:71–82.
25. Loeb M, Brazil K, Lohfeld L, McGeer A, Simor A, Stevenson K, et al. Effect of a multifaceted intervention on number of antimicrobial prescriptions for suspected urinary tract infections in residents of nursing homes: cluster randomised controlled trial. *BMJ*. 2005 Sep 24;331(7518):669.
26. Meeker D, Linder JA, Fox CR, Friedberg MW, Persell SD, Goldstein NJ, et al. Effect of Behavioral Interventions on Inappropriate Antibiotic Prescribing Among Primary Care Practices: A Randomized Clinical Trial. *JAMA*. 2016 Feb 9;315(6):562.

- 1
  - 2
  - 3
  - 4
  - 5
  - 6
  - 7
  - 8
  - 9
  - 10
  - 11
  - 12
  - 13
  - 14
  - 15
  - 16
  - 17
  - 18
  - 19
  - 20
  - 21
  - 22
  - 23
  - 24
  - 25
  - 26
  - 27
  - 28
  - 29
  - 30
  - 31
  - 32
  - 33
  - 34
  - 35
  - 36
  - 37
  - 38
  - 39
  - 40
  - 41
  - 42
  - 43
  - 44
  - 45
  - 46
  - 47
  - 48
  - 49
  - 50
  - 51
  - 52
  - 53
  - 54
  - 55
  - 56
  - 57
  - 58
  - 59
  - 60
27. Concannon C, Quinlan G, Felsen C, Ashley ED, Trivedi KK, Dumyati G. Evaluation of Urinary Tract Infection Testing and Treatment to Guide Antimicrobial Stewardship in the Long-Term Care Facility. *Open Forum Infect Dis* [Internet]. 2015 [cited 2018 Jan 17];2(suppl\_1). Available from: <https://academic.oup.com/ofid/article/2634647/Evaluation>
28. Daneman N, Gruneir A, Bronskill SE, Newman A, Fischer HD, Rochon PA, et al. Prolonged Antibiotic Treatment in Long-term Care: Role of the Prescriber. *JAMA Intern Med*. 2013 Apr 22;173(8):673.

Confidential

## Tables and Figures

Table 1. Urinary Tract Infection Program recommended strategies, and the number of long-term care homes implementing each strategy (N=10 homes).

| Planning and Strategies                                                                  | Definition                                                                                                                                                                                                                                                                                                                        | N |
|------------------------------------------------------------------------------------------|-----------------------------------------------------------------------------------------------------------------------------------------------------------------------------------------------------------------------------------------------------------------------------------------------------------------------------------|---|
| <i>Establishing buy-in and support</i>                                                   |                                                                                                                                                                                                                                                                                                                                   |   |
| Reviewing and revising organizational policies and procedures                            | Reviewing existing policies and procedures to ensure best practices are documented and inconsistencies with current practice recommendations are updated.                                                                                                                                                                         | 6 |
| Selecting and empowering champions                                                       | Selecting staff members who will dedicate themselves to supporting practice changes and the implementation of the program including opportunities to strengthen buy-in.                                                                                                                                                           | 8 |
| Involving local opinion leaders                                                          | Identifying influential colleagues (physicians, nurse practitioners) that can help secure buy-in for the program and be involved in delivering education.                                                                                                                                                                         | 6 |
| Carrying out local consensus processes                                                   | Reaching out to all staff members directly involved in the assessment and management of UTIs to ensure they have received information about the program and support recommended practice changes.                                                                                                                                 | 8 |
| <i>Educating and developing skills</i>                                                   |                                                                                                                                                                                                                                                                                                                                   |   |
| Delivering classroom education to staff                                                  | Providing a formal educational session to staff (30-45 minutes) on the problem and best practices using the UTI Program resources (e.g., PowerPoint slides, fact sheets, and algorithm).                                                                                                                                          | 8 |
| Providing information and education to residents and families                            | Distributing information about the program to residents and families and providing group and one-on-one education to families (e.g., family council meetings).                                                                                                                                                                    | 7 |
| Identifying and supporting coaches to reinforce key practices and support staff          | Identifying staff members who can provide one-on-one education and support to colleagues following a group educational session.                                                                                                                                                                                                   | 8 |
| <i>Monitoring practice and supporting staff</i>                                          |                                                                                                                                                                                                                                                                                                                                   |   |
| Integrating process surveillance and providing regular feedback to staff                 | Assessing compliance to the practice changes using a recommended process surveillance form. Documenting when residents are being assessed for a UTI, relevant symptoms and whether urine is collected and antibiotics prescribed; reviewing forms to assess alignment with recommended criteria; and providing feedback to staff. | 4 |
| Distributing and posting educational resources as reminders to staff about key practices | Ongoing distribution and posting of educational materials to remind staff of practice changes.                                                                                                                                                                                                                                    | 6 |
| UTI, urinary tract infection                                                             |                                                                                                                                                                                                                                                                                                                                   |   |

Table 2. Urine cultures sent and antibiotic prescriptions across the study phases (N=10 long-term care homes)

|                                       | Total | By phase* |                | Baseline vs. Intervention (IRR) |                     |                     |
|---------------------------------------|-------|-----------|----------------|---------------------------------|---------------------|---------------------|
|                                       |       | Baseline  | Implementation | Intervention                    | Unadjusted          | Adjusted            |
| Outcomes<br>(per 1,000 resident-days) |       |           |                |                                 |                     |                     |
| Urine cultures sent                   | 2.64  | 3.20      | 2.35           | 2.09                            | 0.70 (0.61 to 0.79) | 0.72 (0.63 to 0.82) |
| Urinary antibiotic prescriptions      | 1.19  | 1.52      | 1.09           | 0.83                            | 0.59 (0.46 to 0.72) | 0.59 (0.46 to 0.73) |
| Total antibiotic prescriptions        | 3.20  | 3.85      | 2.82           | 2.60                            | 0.74 (0.66 to 0.82) | 0.73 (0.65 to 0.82) |
| Follow-up                             |       |           |                |                                 |                     |                     |
| LTCH-months                           | 163   | 70        | 42             | 52                              | NA                  | NA                  |
| Person-days (000s)                    | 793.2 | 344.8     | 198.2          | 250.2                           | NA                  | NA                  |

Abbreviations: LTCH, long-term care home

Confidential

1  
2  
3  
4  
5  
6  
7  
8  
9  
10  
11  
12  
13  
14  
15  
16  
17  
18  
19  
20  
21  
22  
23  
24  
25  
26  
27  
28  
29  
30  
31  
32  
33  
34  
35  
36  
37  
38  
39  
40  
41  
42  
43  
44  
45  
46  
47  
48  
49  
50  
51  
52  
53  
54  
55  
56  
57  
58  
59  
60

**Figure Legends**

Figure 1. Long-term care homes approached and included.

Figure 2. Variation in monthly rates (per 1,000 resident-days) of urine cultures sent and antibiotic prescriptions (N=10 long-term care homes).

Figure 3. Association between long-term care home-level urine culturing rates and antibiotic prescribing in the baseline and intervention periods (N=10 long-term care homes). Regression-based estimates are superposed.

Confidential



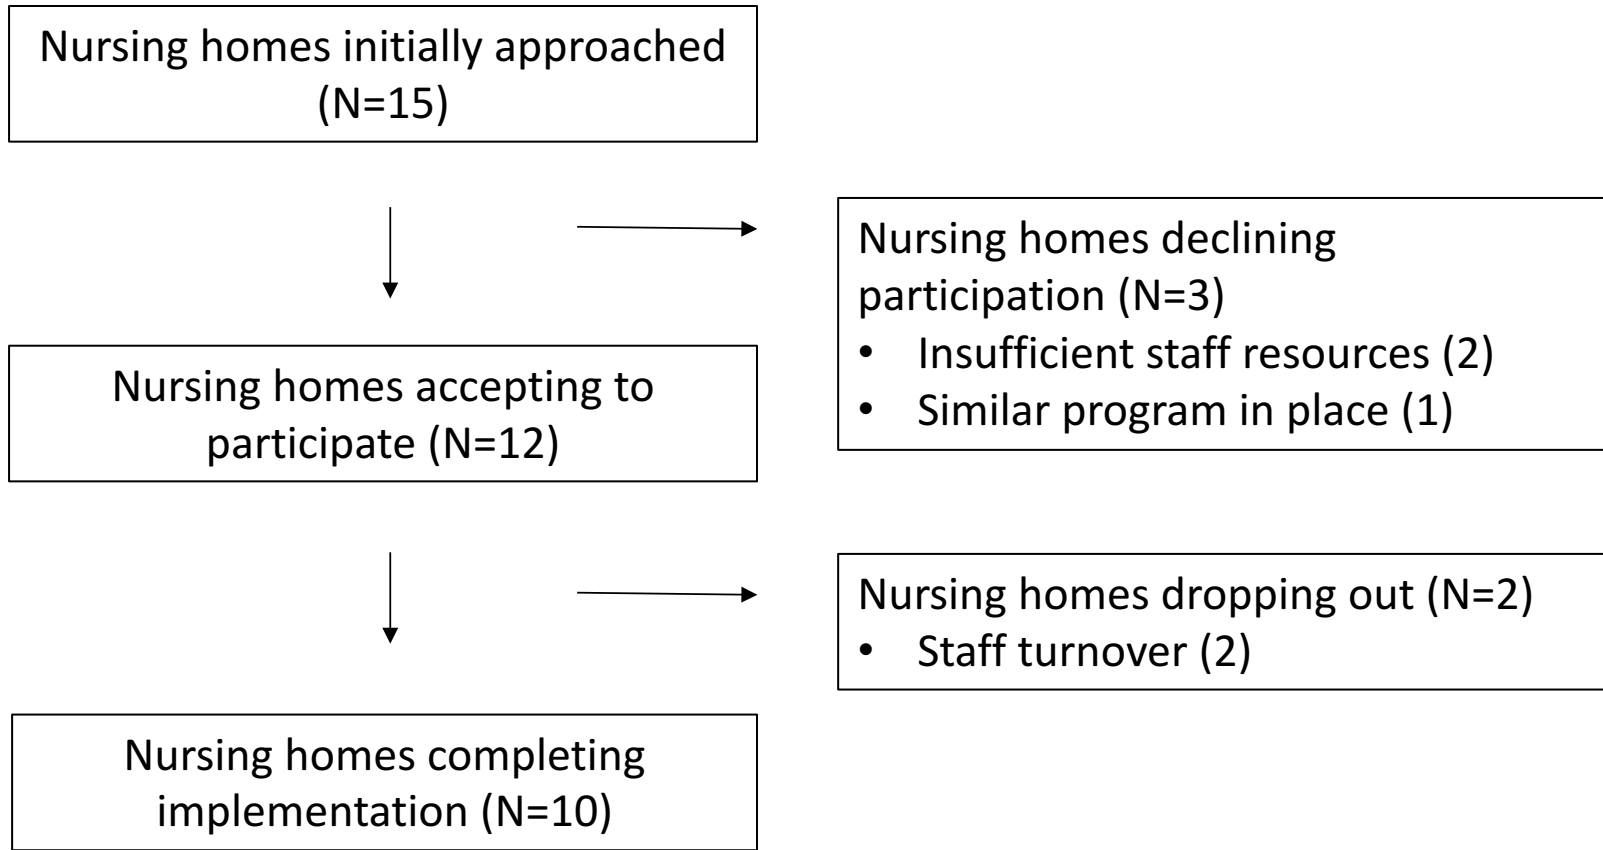

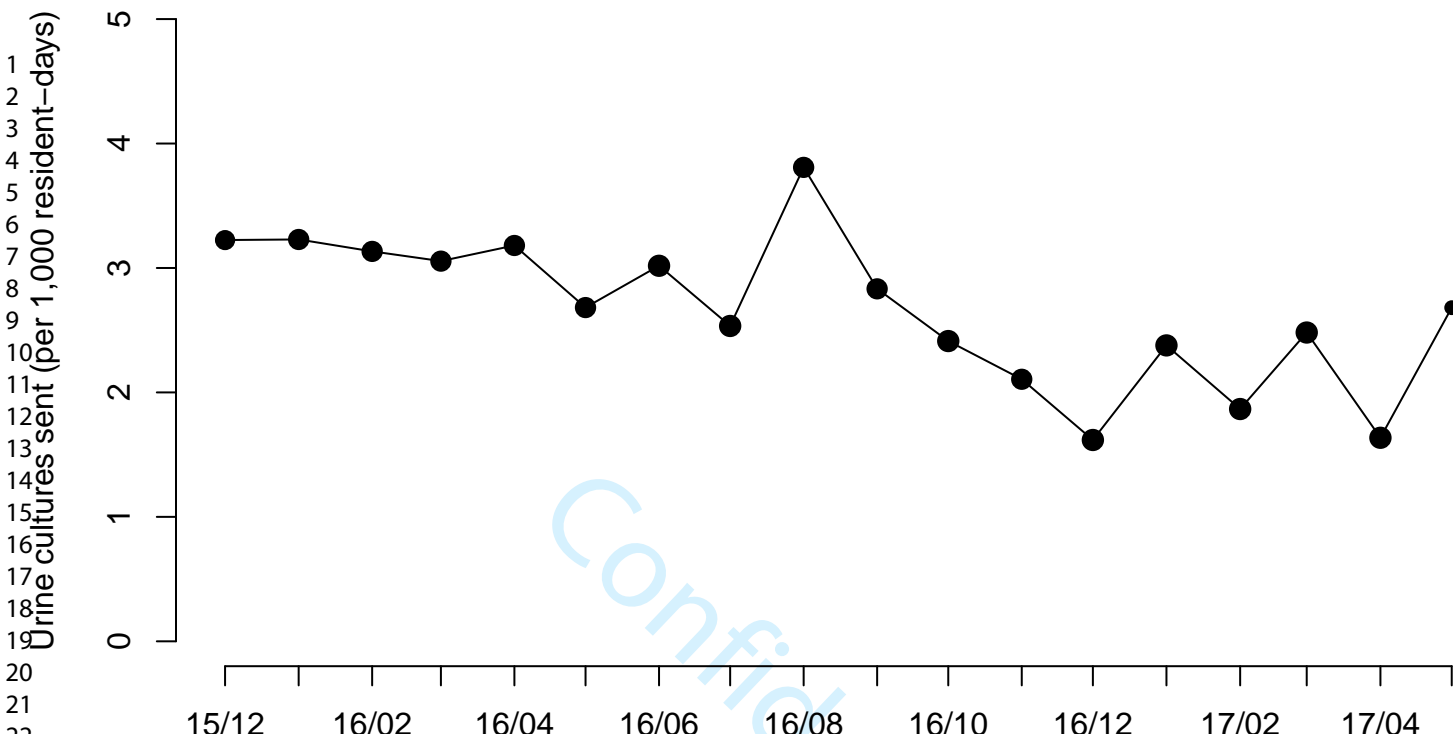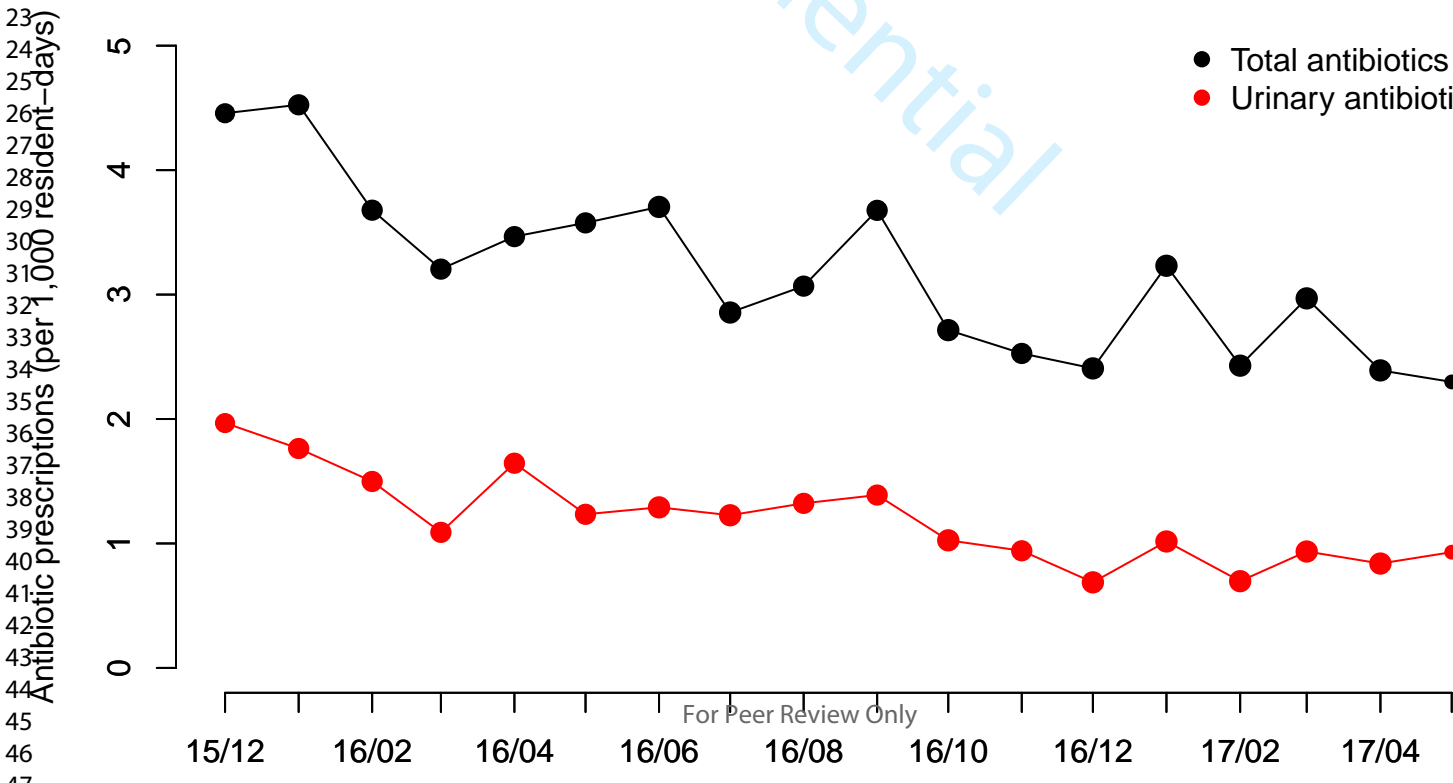

Confidential

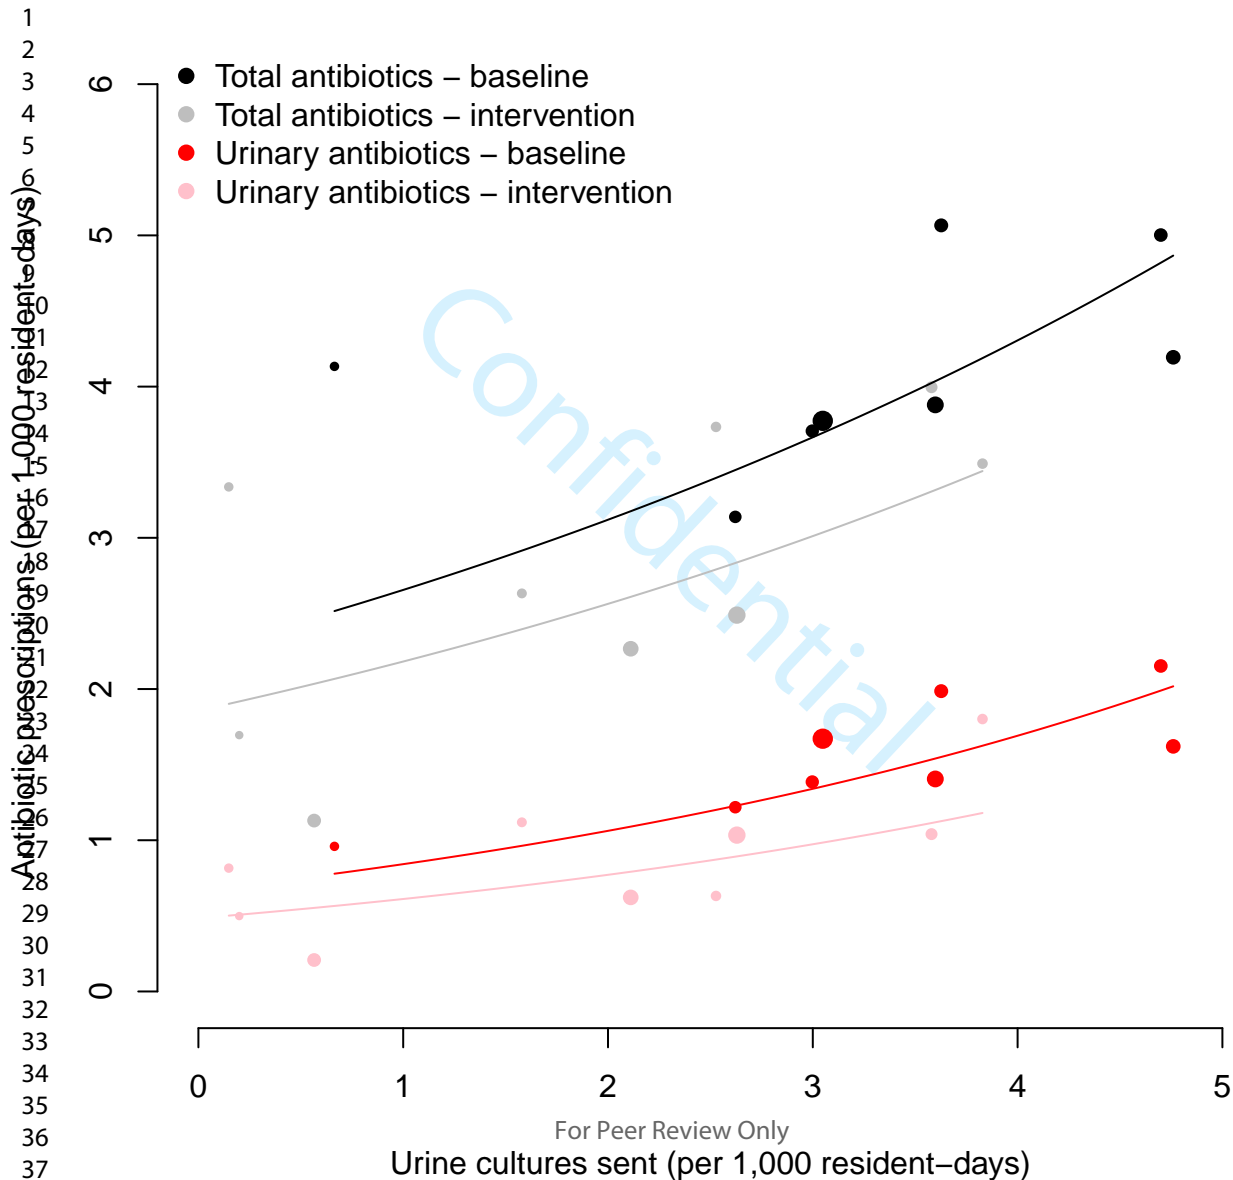

Supplement: 2018-0064-original-submission.pdf [file 2018-0064-original-submission.pdf]
